# Supplementary material
Source: PubMed Central journal article supplement (PMC6290106)
Supplement: ba024364-suppl1.pdf [file ba024364-suppl1.pdf]

## **Supplementary Materials:**

**Flow cytometric methods:** Cryopreserved PBMC were thawed rapidly, washed twice with phosphate-buffered saline containing 2% heat-inactivated fetal bovine serum. The cells were stained with Guava ViaCount and counted on a Beckman Coulter CytoFlex instrument. A minimum of 1 million PBMC were stained for the first panel containing naïve and memory markers and at least 2 million PBMC were stained to assess the frequencies of CD4<sup>+</sup> T cells expressing CD30. Data from both panels were collected on a 4-laser BD LSR-II and data were analyzed using FlowJo 10.4.2 software.

**Supplemental Table 1. Flow cytometry staining reagents.**

| <b>Antibody</b>                            | <b>Fluorophore</b>      | <b>Clone</b> | <b>Vendor</b>     |
|--------------------------------------------|-------------------------|--------------|-------------------|
| <b>Panel 1 CD30 Frequency</b>              |                         |              |                   |
| Dead Cells                                 | Aqua Amine Reactive Dye | n/a          | Life Technologies |
| CD3                                        | FITC                    | UCHT1        | BioLegend         |
| CD4                                        | Brilliant Violet 421    | OKT4         | BioLegend         |
| CD8                                        | APC-Cy7                 | HIT8a        | BioLegend         |
| CD14                                       | Brilliant Violet 650    | M5E2         | BioLegend         |
| CD16                                       | Brilliant Violet 650    | 3G8          | BioLegend         |
| CD19                                       | Brilliant Violet 786    | HIB19        | BioLegend         |
| CD30                                       | PE                      | BERH8        | BD                |
| CD32                                       | APC                     | FUN-2        | BioLegend         |
| <b>Panel 2 Naïve/Memory and Activation</b> |                         |              |                   |
| Dead Cells                                 | Aqua Amine Reactive Dye | n/a          | Life Technologies |
| CCR7                                       | PE-Cy7                  | 3D12         | BD                |
| CD3                                        | Brilliant Violet 711    | UCHT1        | BD                |
| CD38                                       | PE                      | HB7          | BD                |
| CD4                                        | Brilliant Violet 650    | SK3          | BD                |
| CD45RA                                     | PE-TexasRed             | MEM-56       | Life Technologies |
| CD69                                       | FITC                    | L78          | BD                |
| CD8                                        | Brilliant Violet 605    | SK1          | BD                |
| HLA-DR                                     | Alexa700                | G46-6        | BD                |
| PD-1                                       | Brilliant Violet 421    | EH12.1       | BD                |
| CCR5                                       | APC                     | J418F1       | BioLegend         |

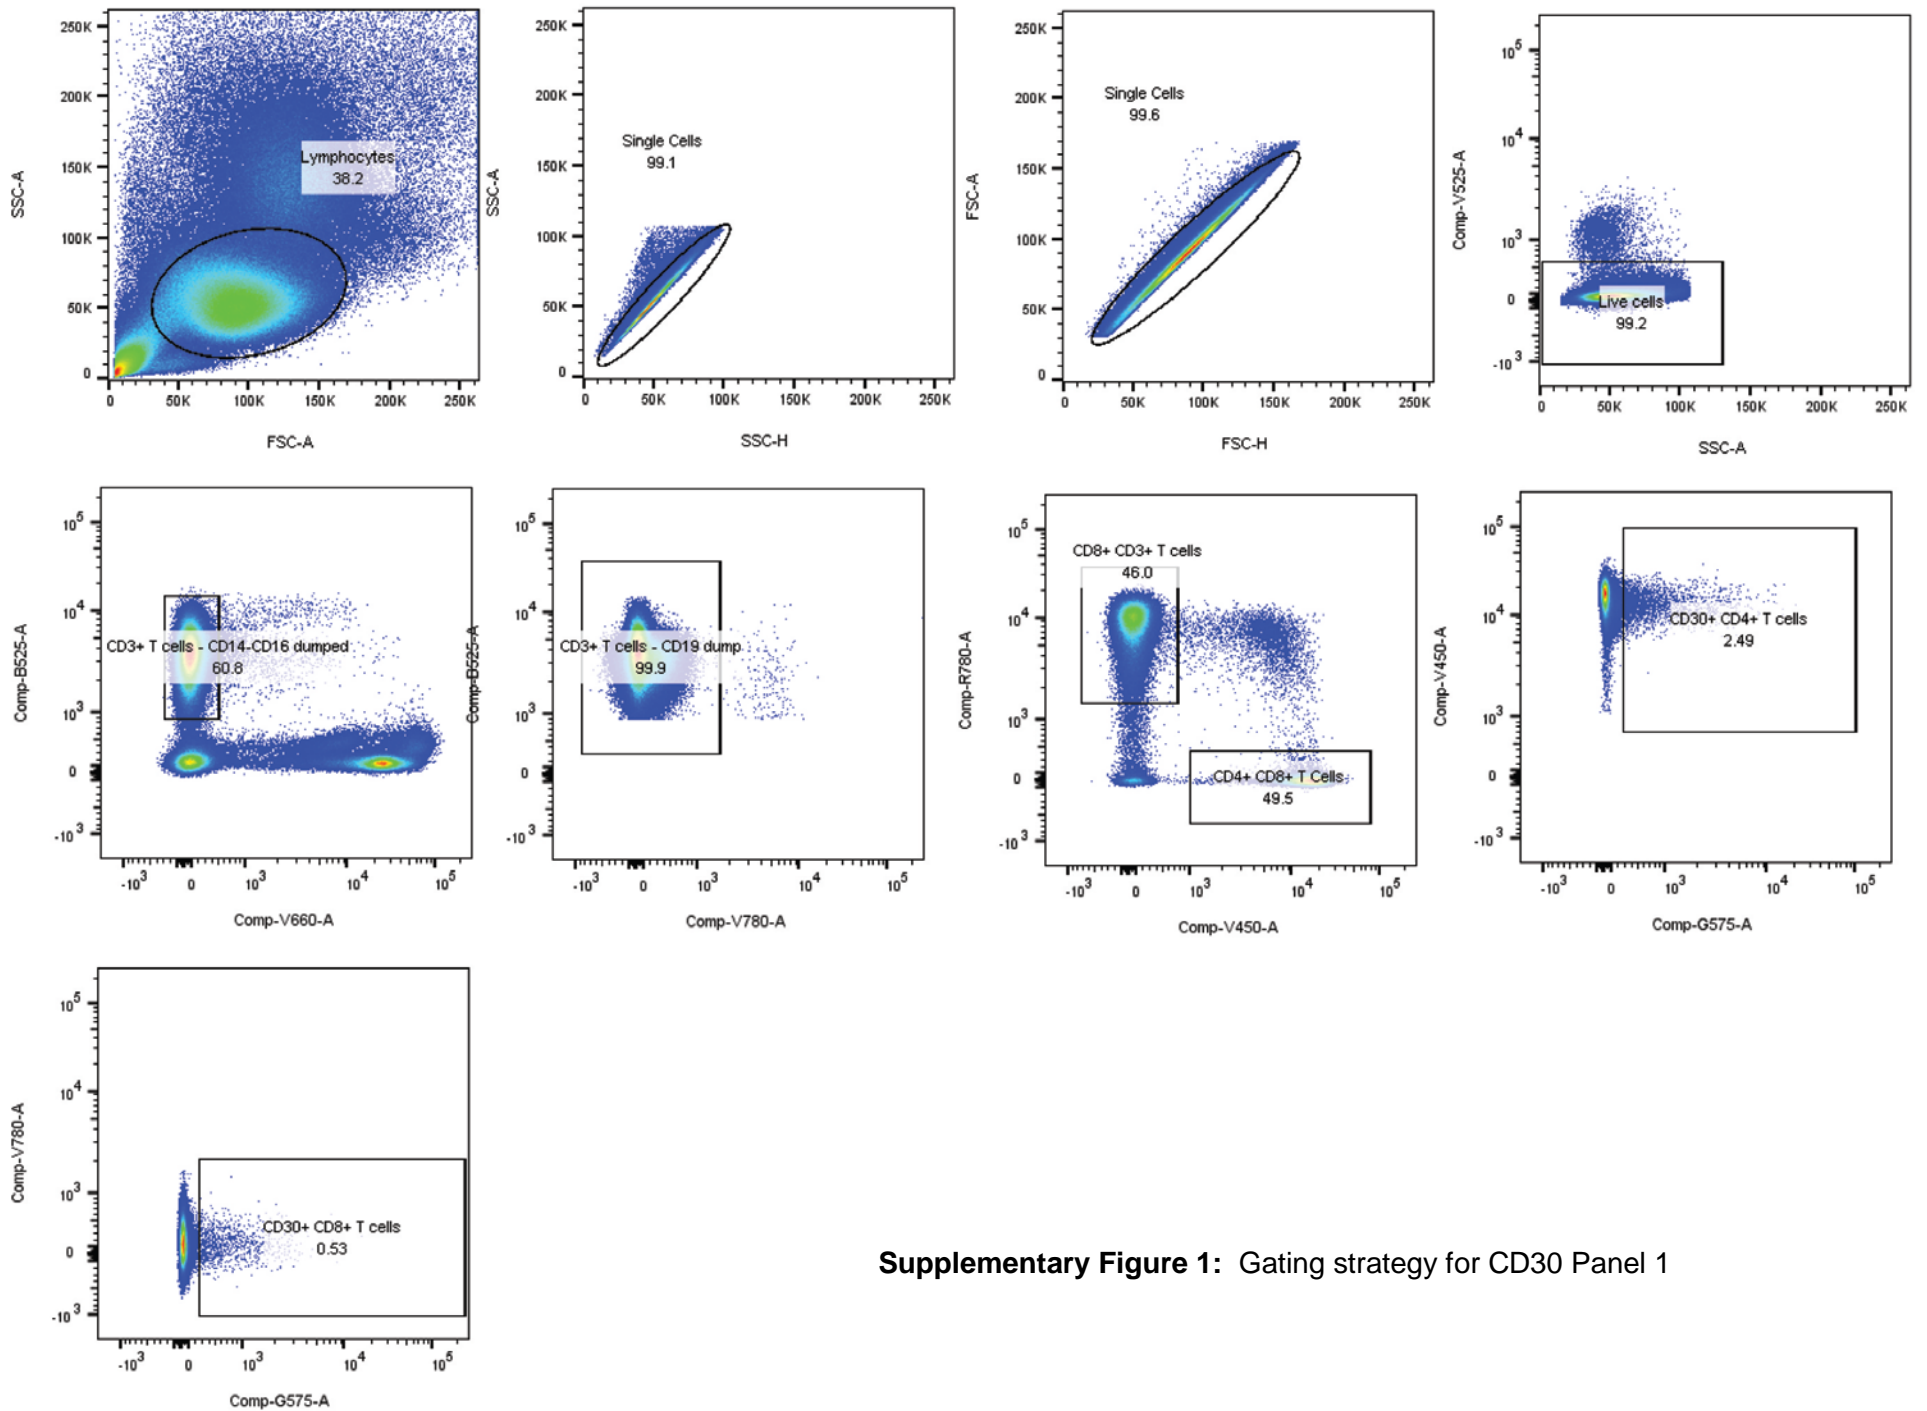

**Supplementary Figure 1: Gating strategy for CD30 Panel 1**

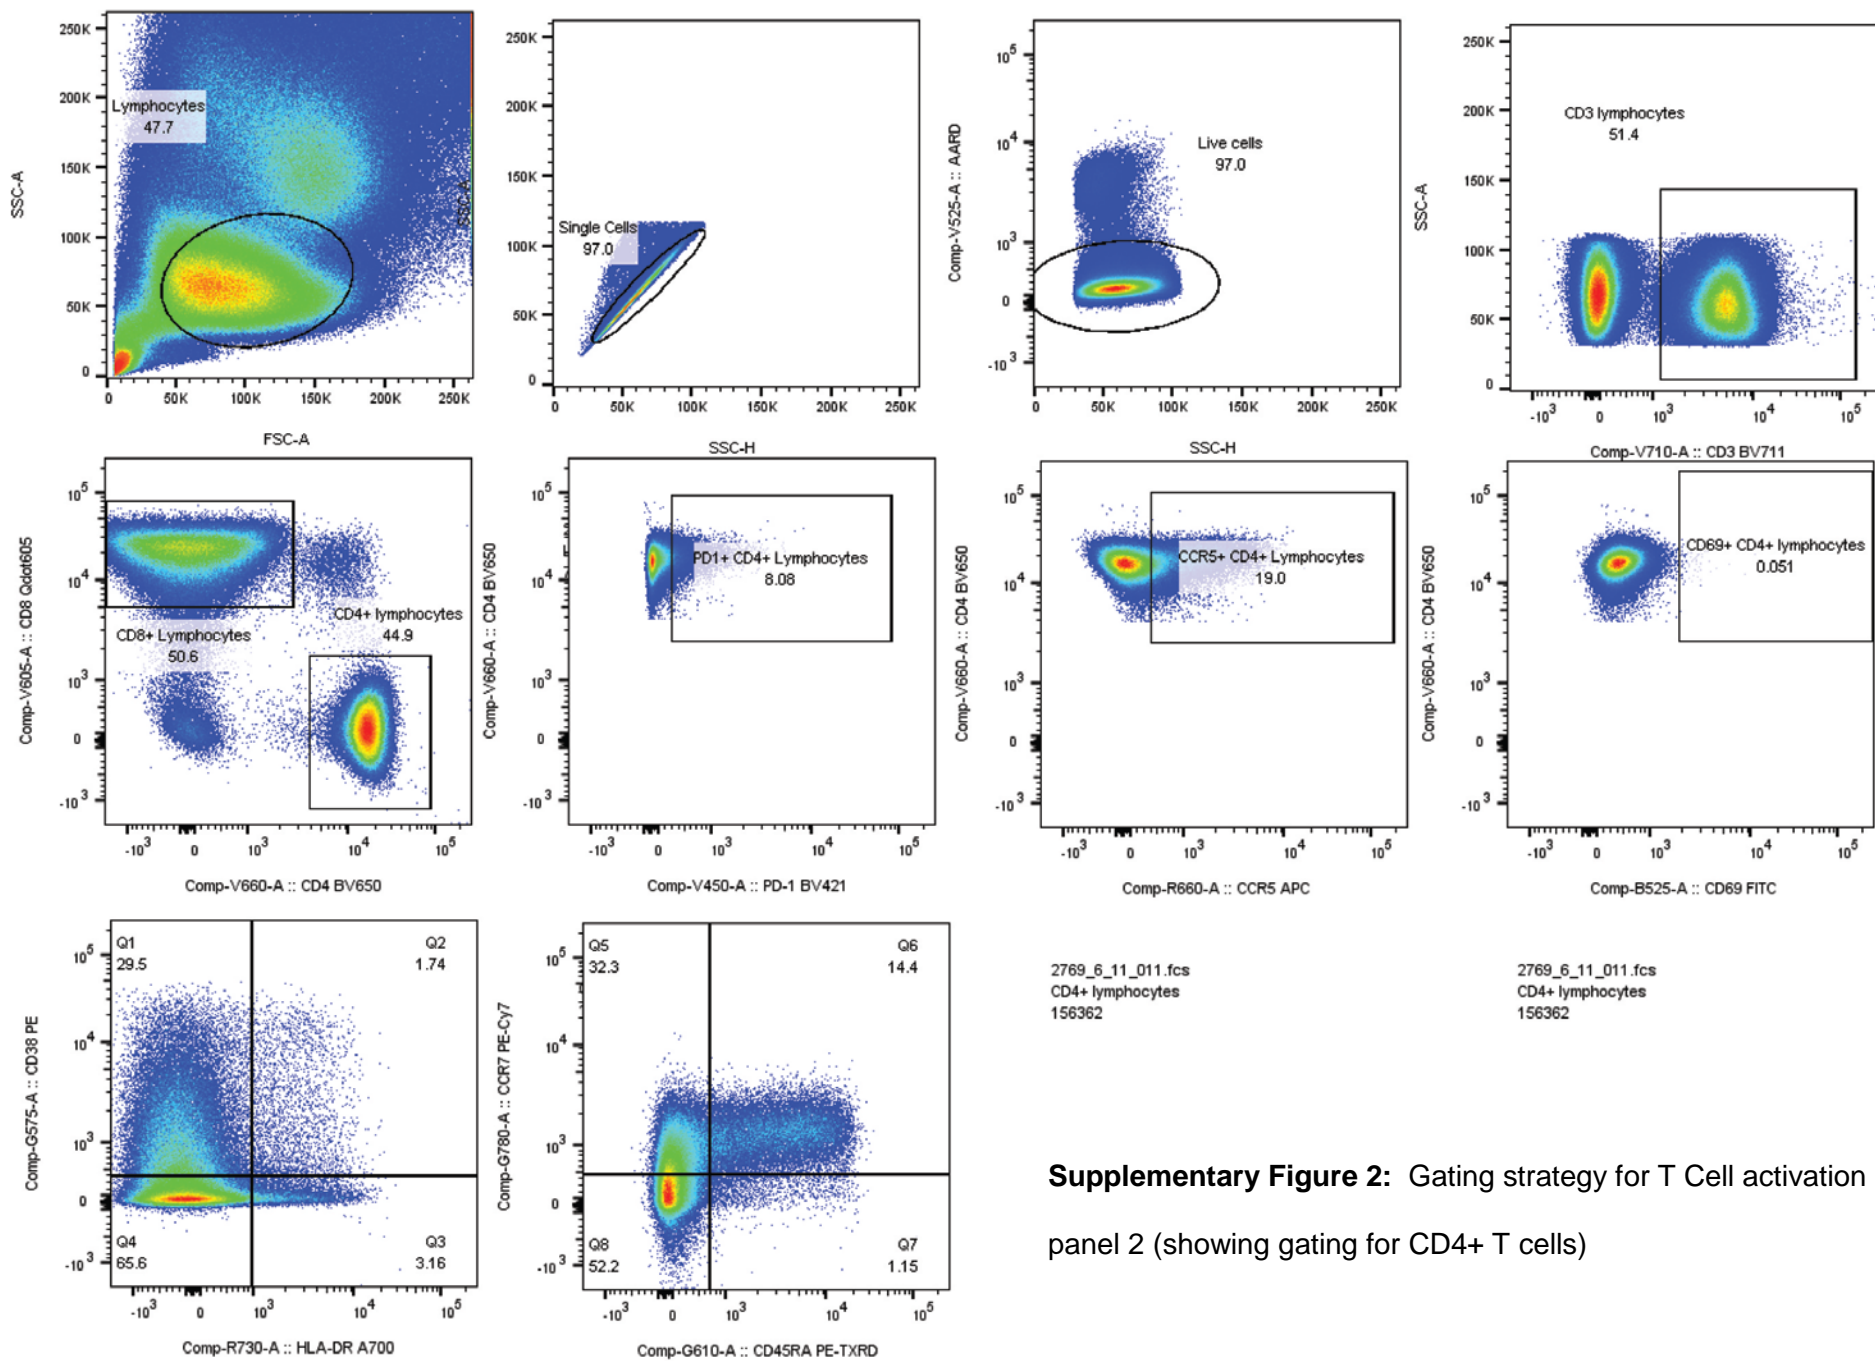

**Supplementary Figure 2: Gating strategy for T Cell activation panel 2 (showing gating for CD4+ T cells)**
